# Supplementary material for: A novel C–C bond formation reaction with 1-methoxymethylindolylborateElectronic supplementary information (ESI) available: selected spectral data for compounds 4a, 6a, 6e (a pair of diastereoisomers) and 6g. See http://www.rsc.org/suppdata/cc/b1/b109880b/
Source: Royal Society of Chemistry journal article supplement (doi:10.1039/b109880b), 2002-01-17
Supplement: b109880b.doc [file b109880b.doc]

# Supplementary data

**4a**: IR (CHCl3): 3440 cm-1. 1H NMR (CDCl3): = 1.30 (t, 3H, *J*=7.3 Hz), 2.50-2.66 (m, 1H), 2.69-2.80 (m, 1H), 4.18 (dd, 1H, *J*=4.4, 15 Hz), 4.26 (dd, 1H, *J*=8.3, 15 Hz), 5.03 (dd, 1H, *J*=4.4, 8.3 Hz), 6.26 (s, 1H), 7.08 (t, 1H, *J*=7.3 Hz), 7.15 (t, 1H, *J*=7.3 Hz), 7.25-7.50 (m, 6H), 7.53 (d, 1H, *J*=7.8 Hz). 13C NMR (CDCl3): = 12.1, 19.7, 50.8, 72.9, 98.1, 109.1, 119.4, 119.8, 120.6, 125.6, 127.9, 128.0, 128.5, 136.8, 141.2, 143.3. HRMS: *m/z* calcd for C18H19NO: 265.1466. Found: 265.1443.

**6a**: IR (neat): 3604, 3488 cm-1. 1H NMR (CDCl3): = 1.10 (t, 3H, *J*=7.3 Hz), 2.12 (br s, 1H), 2.50-2.60 (m, 1H), 2.70-2.80 (m, 1H), 3.42 (d, 2H, *J*=5.8 Hz), 4.14 (dd, 1H, *J*=4.4, 15 Hz), 4.21 (dd, 1H, *J*=8.3, 15Hz), 4.88-5.10 (m, 2H), 5.90-6.00 (m, 1H), 7.06 (t, 1H, *J*=7.8 Hz), 7.14 (t, 1H, *J*=8.3 Hz), 7.28-7.34 (m, 6H), 7.49 (d, 1H, *J*=7.8 Hz). 13C NMR (CDCl3): = 12.3, 14.6, 17.4, 19.8, 28.8, 51.2, 73.2, 98.3, 108.5, 109.3, 114.3, 118.5, 119.1, 120.8, 125.7, 128.0, 128.2, 128.6, 137.7, 139.3, 141.3. HRMS: *m/z* calcd for C21H23NO: 305.1779. Found: 305.1779.

Diastereoisomers (**6e** and **6e’**)

**6e**:IR (neat): 3464 cm-1. 1H NMR (CDCl3): = 0.85 (t, 3H, *J*=7.4 Hz), 1.37 (d, 3H, *J*=6.9 Hz), 1.69-1.79 (m, 2H), 2.02 (br s, 1H), 2.97-3.08 (m, 1H), 3.59 (d, 1H, *J*=5.8 Hz), 4.24 (dd, 1H, *J*=3.9, 15 Hz), 4.33 (dd, 1H, *J*=8.8, 15Hz), 4.95-5.10 (m, 3H), 5.93-6.05(m,1H),7.07(t,1H,*J*=7.8Hz),7.15(t,1H,*J*=7.8Hz),7.30-7.45 (m, 6H), 7.51 (d, 1H, *J*=7.8 Hz). 13C NMR (CDCl3) : = 12.9, 20.2, 29.3, 29.5, 33.1, 51.0, 73.5, 108.5, 109.4, 114.5, 118.4, 119.1, 120.8, 125.7, 128.1, 128.6, 128.8, 136.1, 137.6, 141.2, 141.4.

HRMS: *m/z* calcd for C23H27NO: 303.2093. Found: 303.2099.

**6e’**: IR (neat): 3544 cm-1. 1H NMR (CDCl3): = 0.89 (t, 3H, *J*=7.3 Hz), 1.25 (d, 3H, *J*=7.3 Hz), 1.67-1.88 (m, 2H), 2.00-2.05 (m, 1H), 2.89-3.01 (m, 1H), 3.58 (d, 2H, *J*=6.4 Hz), 4.26 (dd, 1H, *J*=4.4, 15 Hz), 4.35 (dd, 1H, *J*=8.8, 15 Hz), 4.96-5.13 (m, 3H), 5.92-6.04 (m, 1H), 7.08 (t, 1H, *J*=7.3 Hz), 7.16 (t, 1H, *J*=7.6 Hz), 7.30-7.44 (m, 6H), 7.51 (d, 1H, *J*=7.8 Hz). 13C NMR (CDCl3): = 12.9, 20.1, 29.2, 29.5, 33.2, 51.1, 73.7, 108.7, 109.5, 114.6, 118.4, 119.1, 120.9, 125.8, 128.2, 128.7, 128.8, 136.3, 137.6, 141.1, 141.3.

HRMS: *m/z* calcd for C23H27NO: 303.2093. Found: 303.2088.

**6g**: IR (neat): 3472,1718,1650 cm-1. 1H NMR (CDCl3): = 1.12 (t, 3H, *J*=7.5 Hz), 2.13 (br s, 1H), 2.47-2.63 (m, 1H), 2.69-2.73 (m, 1H), 3.59 (dd, 2H, *J*=1.5, 6.0 Hz), 3.67 (s, 3H), 4.22 (dd, 1H, *J*=3.4, 14 Hz), 4.31 (dd, 1H, *J*=8, 14 Hz), 5.10 (dd, 1H, *J*=3.4, 8Hz), 5.76 (d, 1H, *J*=15 Hz), 7.06-7.22 (m, 3H), 7.30-7.42 (m, 5H), 7.44 (d, 1H, *J*=7.8 Hz). 13C NMR (CDCl3): = 14.5, 17.3, 27.2, 51.1, 72.9, 118.1, 119.4, 120.7, 121.0, 125.7, 127.8, 128.0, 128.5, 136.1, 139.9, 141.5, 148.4, 167.2. HRMS: *m/z* calcd for C23H25NO3: 363.1834 Found: 363.1826.
